# Supplementary material for: A 99mTc-Labelled Tetrazine for Bioorthogonal Chemistry. Synthesis and Biodistribution Studies with Small Molecule trans-Cyclooctene Derivatives
Source: PubMed Central journal article supplement (PMC5147877; doi:10.1371/journal.pone.0167425), 2016-12-09
Supplement: pone.0167425.s001.pdf [file pone.0167425.s001.pdf]

## Reaction kinetics and rate constant calculation for HYNIC-tetrazine (**2**) with TCO-OH.

**Fig A:**

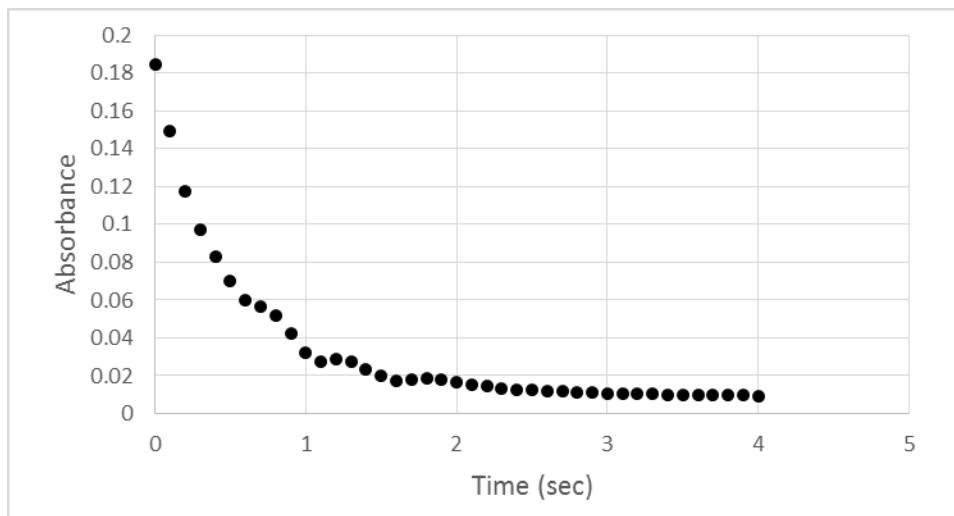

Absorbance at 534 nm ( $A_{534}$ ) versus time following the addition of TCO-OH (10 mM) to **2** (1.0 mM) in MeOH.

**Fig B:**

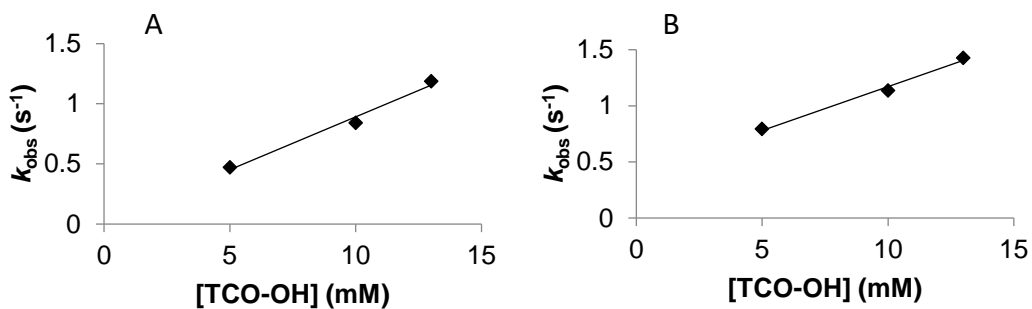

Plots of  $k_{obs}$  versus TCO concentration for the reaction of **2** with TCO-OH (A), and reaction of **1** with TCO-OH (B) in MeOH
