# Supplementary material for: A 99mTc-Labelled Tetrazine for Bioorthogonal Chemistry. Synthesis and Biodistribution Studies with Small Molecule trans-Cyclooctene Derivatives
Source: PubMed Central journal article supplement (PMC5147877; doi:10.1371/journal.pone.0167425), 2016-12-09
Supplement: pone.0167425.s003.pdf [file pone.0167425.s003.pdf]

## Reaction products of $^{99m}\text{Tc}$ -HYNIC-tetrazine (**4**) with TCO-OH

Fig D:

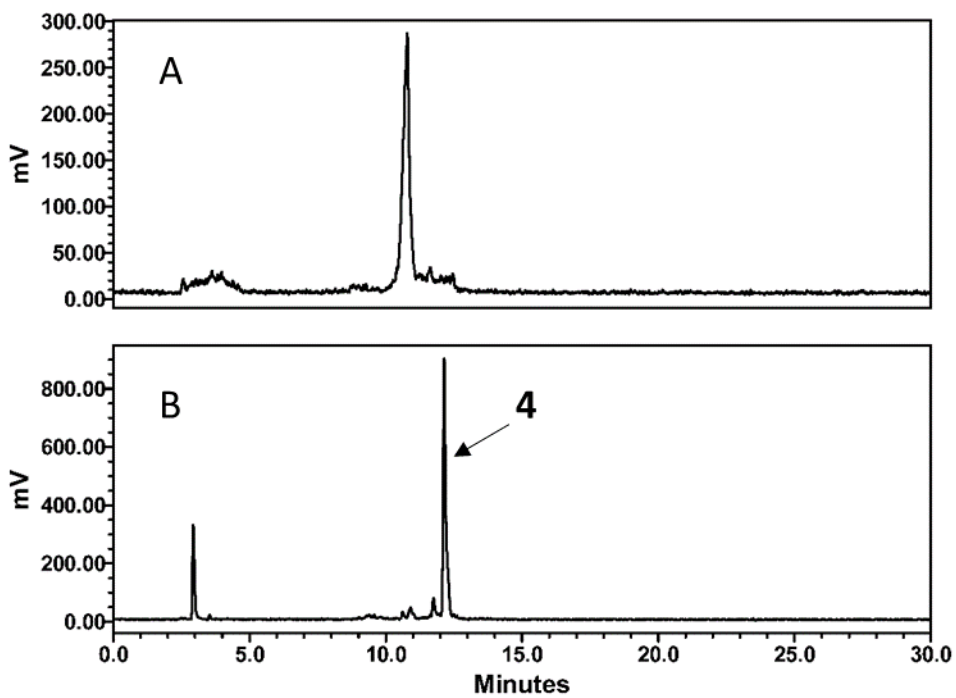

$\gamma$ -HPLC chromatograms of **4** alone (B) or 0.5 h after reaction of **4** with TCO-OH (A).
