# Supplementary material for: A 99mTc-Labelled Tetrazine for Bioorthogonal Chemistry. Synthesis and Biodistribution Studies with Small Molecule trans-Cyclooctene Derivatives
Source: PubMed Central journal article supplement (PMC5147877; doi:10.1371/journal.pone.0167425), 2016-12-09
Supplement: pone.0167425.s004.pdf [file pone.0167425.s004.pdf]

## Biodistribution data.

**Table A:** Biodistribution data for 4.

| Organs                | Timepoint (h)  |                |               |              |
|-----------------------|----------------|----------------|---------------|--------------|
|                       | 0.5            | 1              | 2             | 6            |
| Blood                 | 4.85 ± 0.14    | 4.33 ± 0.17    | 3.82 ± 0.12   | 1.70 ± 0.28  |
| Adipose               | 0.35 ± 0.08    | 0.18 ± 0.02    | 0.31 ± 0.02   | 0.17 ± 0.03  |
| Adrenals              | 1.29 ± 0.09    | 1.09 ± 0.07    | 1.12 ± 0.08   | 0.77 ± 0.17  |
| Bone                  | 0.97 ± 0.06    | 0.78 ± 0.07    | 0.77 ± 0.00   | 0.51 ± 0.02  |
| Brain                 | 0.10 ± 0.01    | 0.07 ± 0.00    | 0.07 ± 0.00   | 0.04 ± 0.01  |
| Gall Bladder          | 68.56 ± 6.86   | 36.03 ± 9.68   | 35.90 ± 10.90 | 9.45 ± 7.53  |
| Heart                 | 1.49 ± 0.01    | 1.26 ± 0.04    | 1.27 ± 0.03   | 0.66 ± 0.11  |
| Kidneys               | 5.67 ± 0.08    | 4.12 ± 0.18    | 3.88 ± 0.12   | 2.79 ± 0.44  |
| Lg Intestine + Caecum | 0.60 ± 0.06    | 0.69 ± 0.04    | 3.61 ± 0.87   | 11.99 ± 2.43 |
| Liver                 | 7.42 ± 0.70    | 5.23 ± 0.54    | 4.52 ± 0.83   | 4.35 ± 0.85  |
| Lungs                 | 2.46 ± 0.07    | 2.09 ± 0.12    | 1.98 ± 0.11   | 1.34 ± 0.24  |
| Pancreas              | 0.77 ± 0.01    | 0.61 ± 0.05    | 0.58 ± 0.04   | 0.34 ± 0.05  |
| Skeletal Muscle       | 0.53 ± 0.04    | 0.40 ± 0.01    | 0.39 ± 0.01   | 0.33 ± 0.06  |
| Sm Intestine          | 5.79 ± 0.80    | 6.04 ± 0.76    | 6.46 ± 1.49   | 0.96 ± 0.21  |
| Spleen                | 0.92 ± 0.04    | 0.75 ± 0.05    | 0.74 ± 0.06   | 0.54 ± 0.07  |
| Stomach               | 3.31 ± 0.64    | 4.14 ± 0.38    | 6.08 ± 0.80   | 4.41 ± 1.57  |
| Thyroid/Trachea       | 5.48 ± 0.21    | 4.40 ± 0.97    | 5.81 ± 0.44   | 2.13 ± 0.85  |
| Urine + Bladder       | 261.83 ± 85.39 | 172.71 ± 31.98 | 98.92 ± 55.68 | 8.15 ± 3.24  |

**Note:** Data are %ID/g, expressed as mean ± SEM.

**Table B:** Biodistribution data for active targeting with **5**.

| Organs            | Timepoint (h) |         |
|-------------------|---------------|---------|
|                   | 6h            |         |
| Blood             | 2.01          | ± 0.27  |
| Gall Bladder      | 16.24         | ± 11.32 |
| Kidneys           | 6.59          | ± 0.52  |
| Knee              | 13.33         | ± 0.37  |
| Liver             | 2.42          | ± 0.27  |
| Shoulder          | 8.13          | ± 0.49  |
| Sm & Lg Intestine | 3.62          | ± 0.47  |
| Stomach           | 7.50          | ± 2.13  |
| Thyroid/Trachea   | 9.68          | ± 0.90  |

Note: Data are %ID/g, expressed as mean ± SEM.

**Table C:** Biodistribution data for pretargeting with TCO-BP and **4**.

| Organs            | Timepoint (h) |        |
|-------------------|---------------|--------|
|                   | 6h            |        |
| Blood             | 7.00          | ± 0.08 |
| Gall Bladder      | 9.65          | ± 1.08 |
| Kidneys           | 7.92          | ± 0.39 |
| Knee              | 9.57          | ± 0.71 |
| Liver             | 5.60          | ± 0.22 |
| Shoulder          | 7.03          | ± 1.04 |
| Sm & Lg Intestine | 3.81          | ± 0.67 |
| Stomach           | 8.48          | ± 0.91 |
| Thyroid/Trachea   | 6.37          | ± 0.55 |

Note: Data are %ID/g, expressed as mean ± SEM.

**Table D:** Biodistribution data for active targeting with <sup>99m</sup>Tc-HYNIC-tetrazine-TCO-vancomycin.

| Organs               | Timepoint (h) |             |
|----------------------|---------------|-------------|
|                      | 1             | 6           |
| Blood                | 6.20 ± 0.46   | 4.22 ± 1.38 |
| Kidneys + Adrenals   | 7.03 ± 0.43   | 7.73 ± 2.10 |
| Liver + Gall Bladder | 4.19 ± 0.21   | 4.09 ± 1.24 |
| Lymph node (leg)     | 1.39 ± 0.45   | 1.23 ± 0.03 |
| Small Intestine      | 7.81 ± 0.68   | 2.87 ± 0.72 |
| Spleen               | 2.62 ± 0.40   | 2.73 ± 0.78 |
| Calf (Left)          | 0.72 ± 0.08   | 0.90 ± 0.31 |
| Calf (Right)         | 2.19 ± 0.39   | 2.07 ± 0.64 |

**Note:** Data are %ID/g, expressed as mean ± SEM.

**Table E:** Biodistribution data for pretargeting with TCO-vancomycin (7) with <sup>99m</sup>Tc-HYNIC-tetrazine (4).

| Organs               | Timepoint (h) |             |
|----------------------|---------------|-------------|
|                      | 1             | 6           |
| Blood                | 4.29 ± 0.25   | 2.33 ± 0.09 |
| Kidneys + Adrenals   | 5.65 ± 0.61   | 4.68 ± 0.36 |
| Liver + Gall Bladder | 7.03 ± 0.22   | 5.86 ± 0.09 |
| Lymph node (leg)     | 0.85 ± 0.34   | 0.99 ± 0.07 |
| Small Intestine      | 13.82 ± 0.87  | 1.59 ± 0.03 |
| Spleen               | 4.78 ± 0.38   | 4.83 ± 0.69 |
| Calf (Left)          | 0.93 ± 0.13   | 0.65 ± 0.07 |
| Calf (Right)         | 1.96 ± 0.13   | 1.65 ± 0.10 |

**Note:** Data are %ID/g, expressed as mean ± SEM.
